# Supplementary material for: A Framework for Assessing Urban Carrying Capacity and its Impact on Water and Sanitation Service Delivery in a Hill City
Source: Research Square preprint supplement (doi:10.21203/rs.3.rs-7650629/v1), 2025-10-15
Supplement: Supplementary file 1 [file CC_Calculation.xlsx]

## Sheet: Sheet1
Physical Carrying Capacity (PCC)
It is the maximum number of visits that can be made to a site with a defined space, in a given time.
		Area	V/A (Visitor per meter 2)	Rotation Factor (Rf)	PCC/Day = A X V/A X Rf
Description		A is the available area for tourist/public use. A(Available area for Tourism/Public use) = A1(Municipal Area) - A2 (Reserved Forest Area) A1 = 11730000 sq m A2 = 1302700 sq m A = 10427300 sq m Area available for residents and floating population	The Urban Regional Development Plans Formulation and Implementation (URDPFI) guidelines, 2014 recommend 10 to 12 sq.mt. of open space per person for small towns.	Rf = open period/average time of visit Open period = 24 hrs, Average time of visit = 24 hrs = 24/24 = 1	834184
Value		10427300	0.08	1
Real Carrying Capacity (RCC)
RCC is defined as the maximum allowable number of tourists to the specific site within a given area, once the reductive/corrective factors (Cf) derived from the particular characteristics of the site has been applied to the PCC.
	Parameter	Correction Factor (Cf)	ML (Limiting magnitude of variable)	MT (Total magnitude of variable)	Cf = 1-ML/MT
Description	Topography and Climate	Slope (Cf 1) : An area having a slope above 30° is not suitable for construction and is prone to landslides (Uttarakhand Building construction and development Byelaws)	ML = Area under slope above 30° (Slope analysis using DEM Data using GIS)	MT = Total area of city (Municipal Area of Nainital in sq m)
Value		Cf 1	3425400	11730000	0.70798
Description		Rainfall (Cf 2) : Rainy season in Nainital occurs in the months of June, July, August and September. Chances of road blockages and landslides increase during these times.	ML= Total number of days with heavy rainfall (IMD)	MT = Total number of days in a year
Value		Cf 2	21	365	0.942466
Description	Ecologically Vulnerable Area	Urban Green Cover (Cf 3): Urban green cover includes all types of visible green vegetation such as forests (excluding reserved forest as already considered in PCC calculation), agriculture, vegetation along streams and lakes, recreational parks, gardens, vegetation along streets, and inside plots. Urban green cover is a limiting factor as biodiversity needs to be protected from anthropogenic acti…	ML= Urban Green cover in Nainital Municipal Area (sq m)	MT = Total area of city (Municipal Area of Nainital in sq m)
Value		Cf 3	2744600	11730000	0.766019
Description		Landslide Prone Area (Cf 4) : Nainital township located in the Kumaun Lesser Himalaya is known to be vulnerable to landslides since past, and it has been reported that half of the area of the township is covered with debris generated by landslide.	ML= Area under moderate to high-risk zone of landslide suseptibility in Nainital Municipal Area (sq m)	MT = Total area of city (Municipal Area of Nainital in sq m)
Value		Cf 4	7624500	11730000	0.35
Real Carrying Capacity of Nainital Municipal Area (RCC)/Day			RCC/Day = PCC X Cf1 x Cf2 x Cf3 x Cf4		149230
Effective Carrying Capacity (ECC)
Effective Carrying Capacity is defined as the maximum number of people that an area can sustain, given the management capacity that is available at a particular place.
	Parameter	Management Capacity (Mc)	Real Management Capacity (Amc)	Ideal Management Capacity (Imc)	Management Adjustment Factor (Fm) = ( Imc - Amc)/Imc x100	Management Capacity (Mc) = 100-Fm/100
Description	Water Supply	Per capita water supply: The average amount of water supplied per day to every individual. It is a key indicator of how well a destination can handle tourists without compromising resources for residents or the environment	Amc = Per capita water supply (L) in Nainital (2024)	Imc = Per capita water supply (L) as per norms. (Service level Benchmark, MoHUA)
Value		Mc 1	112	135	17.037	0.82963		37604.6
Description		Maximum safe Volume of the Lake : The volume of Naini Lake directly affects Nainital’s ability to sustain tourism by influencing water availability, aesthetics, recreational opportunities, and environmental sustainability.	Amc = Average volume of Lake in m3 (2024), equivalent to 10 ft from the lake bed	Imc = Maximum safe Volume of Lake in m3 (equivalent to 24 ft from lake bed)
Value		Mc 2	2258820	4587914	50.7659	0.492341
Description		Continuity of water supplied : Continuity of water supply is essential because it directly affects the city's ability to sustain its population, economy, and overall livability	Amc = Continuity of water supply in Nainital (2024) in hrs	Imc = Continuity of water supply as per norms in hrs (Service level Benchmark, MoHUA)
Value		Mc 3	18.5	24	22.9167	0.770833
Description		Annual Rate of groundwater extraction:	Amc = Rate of annual ground water extraction for Nainital District (2023)	Imc = Maximum safe rate of annual ground water extraction in % as per CGWB			Discrepency in Data available , Data considered for Nainital district, CGWB 2024 Report		Nainital no. of springs - 7 Groundwater monitoring station -18 Annual Rainfall - 1527.8mm Depth of GWL - min 5.95 mbgl, max - 66.48 mbgl
Value		Mc 4	52.03	70	25.6714	0.743286	48>36
Average value for water supply management capacity Mc(W)						0.709023	0.19
Description	Sanitation	Coverage of sewerage network: Sewerage coverage is a critical factor because it directly impacts public health, environmental sustainability, and overall livability	Amc= Sewerage Network Coverage in Nainital (2024) in %	Imc = Sewerage Network Coverage as per norms (Service level Benchmark, MoHUA) in %
Value		Mc 5	95	100	5	0.95
Description		Wastewater Treatment	Amc= Existing Wastewater Treatment Capacity in MLD	Imc= Total amount of wastewater generated in MLD (based on 80% of water supplied)
Value		Mc 6	2.5	6.12	59.1503	0.408497
Average value for sanitation management capacity Mc(S)						0.679248		48788.6
Description	Solid waste management	Waste Collection and Recycling : Efficient solid waste collection and recycling ensure a city can handle tourist influx without environmental degradation, pollution, or public health risks. Proper waste management preserves urban cleanliness, sustainability, and the destination’s appeal to visitors.	Amc = Amount of Waste recycled in Nainital (2024)	Imc = Total waste collected in peak season in tonnes/day (2024)
Value		Mc 8	5	25	80	0.2
Description		Provision of Dustbins: The provision of dustbins in a city is a crucial indicator as it ensures proper waste management, preventing littering and environmental pollution. Adequate waste disposal infrastructure supports hygiene, public health, and the overall sustainability of urban tourism.	Amc= No. of dustbins provided in the Nainital Municipal Area (2024)	Imc= No. of Dustbins to be provided as per standards (The National Action Plan for Municipal Solid Waste Management, CPCB, 2015)
Value		Mc 9	85	130	34.6154	0.653846
Average value for solid waste management capacity Mc(SW)						0.426923		50989.3
Description	Tourism Facilities	Parking: Parking is a crucial indicator as it reflects the ability to accommodate residents and visitors without causing congestion, inefficiency, or urban stress. Limited parking can lead to traffic jams, illegal parking, and reduced accessibility, affecting overall livability and tourism experience.	Amc = Total No. of Parking spaces in Nainital (Govt. owned)	Imc = Total no. cars entering Nainital in peak seasons
Value		Mc 8	685	2000	65.75	0.3425
Description		Accommodation: Accommodation is a key indicator as it determines the maximum number of visitors the city can host without overcrowding. Limited accommodation can lead to rising prices, strain on infrastructure, and decreased visitor satisfaction.	Amc= Total no. of overnight beds registered with the NNPP	Imc = No. of overnight visitors per day in Nainital (annual avaerage)
Value		Mc 9	7226	35000	79.3543	0.206457
Average value for Tourism management capacity Mc(T)						0.274479		32782.2
Effective Carrying Capacity (ECC)/Day = RCC X Mc(W) X Mc(S) X Mc(SW) X Mc (T)						8421.75
						45791 - projected population for 2025 using arithmetic method
