# Supplementary material for: A Framework for Assessing Urban Carrying Capacity and its Impact on Water and Sanitation Service Delivery in a Hill City
Source: Research Square preprint supplement (doi:10.21203/rs.3.rs-7650629/v1), 2025-10-15
Supplement: Supplementary file 3 [file 6576cca72a7119025c76f901.docx]

**Appendix:**

1. **Preliminary Criteria Catalogue:** All criteria pertaining to carrying capacity identified through literature review.

| **S.No.** | **Category** | **Indicator** | **Unit** | **Source** |
| --- | --- | --- | --- | --- |
| **1.** | **Water** | Per Capita water resource | m3 | [(Yang et al.,2010)](https://sci-hub.se/https:/doi.org/10.1016/j.cnsns.2009.09.027), [(Oh et al.,2005)](https://www.scribd.com/document/788762426/Determining-Development-Density-Using-the-Urban-Carrying-Capacity-Assessment-System), [(Wei et al.,2014)](https://www.semanticscholar.org/paper/Sustainable-urban-development%3A-A-review-on-urban-Wei-Huang/21cc7fa87507537893dbceef4cb07a64174ef0d5), [(Dong et al,2022)](https://www.mdpi.com/2071-1050/14/22/15124) |
| Per capita water supply | lpcd | [(Oh et al.,2005)](https://www.scribd.com/document/788762426/Determining-Development-Density-Using-the-Urban-Carrying-Capacity-Assessment-System), [(Bhagwat, 2021)](https://doi.org/10.1007/978-3-030-61891-9_6),  [(Schroll et al.,2012)](https://journal-tes.ruc.dk/wp-content/uploads/2021/05/no-5-Henning-Schroll.pdf) |
| Decrease of Water Consumption | GDP/Capita | [(Wei et al.,2014)](https://www.semanticscholar.org/paper/Sustainable-urban-development%3A-A-review-on-urban-Wei-Huang/21cc7fa87507537893dbceef4cb07a64174ef0d5) |
| Total amount of water resources | Hectares | [(Dong et al,2022)](https://www.mdpi.com/2071-1050/14/22/15124) |
| Drinking Water | lpcd | [Jangra and Kaushik (2021)](https://www.researchgate.net/publication/345320353_Estimating_Carrying_Capacity_in_a_High_Mountainous_Tourist_Area_A_Destination_Conservation_Strategy) |
| Water Consumption | m3 | [(Schroll et al.,2012)](https://journal-tes.ruc.dk/wp-content/uploads/2021/05/no-5-Henning-Schroll.pdf) |
| Water Quality, BOD levels | Mg/Litre | [(Schroll et al.,2012)](https://journal-tes.ruc.dk/wp-content/uploads/2021/05/no-5-Henning-Schroll.pdf) |
| **2.** | **Sanitation** | Percentage of sewage treatment | % | [(Yang et al.,2010)](https://sci-hub.se/https:/doi.org/10.1016/j.cnsns.2009.09.027),  [(Oh et al.,2005)](https://www.scribd.com/document/788762426/Determining-Development-Density-Using-the-Urban-Carrying-Capacity-Assessment-System) |
| Discharge intensity of COD per unit GDP | kg/unit GDP | [(Yang et al.,2010)](https://sci-hub.se/https:/doi.org/10.1016/j.cnsns.2009.09.027) |
| Ratio of reusable water reused | % | [(Wei et al.,2014)](https://www.semanticscholar.org/paper/Sustainable-urban-development%3A-A-review-on-urban-Wei-Huang/21cc7fa87507537893dbceef4cb07a64174ef0d5) |
| Recycling rate of industrial water | % | [(Wei et al.,2014)](https://www.semanticscholar.org/paper/Sustainable-urban-development%3A-A-review-on-urban-Wei-Huang/21cc7fa87507537893dbceef4cb07a64174ef0d5) |
| Urban industrial wastewater treatment rate | GDP/Capita | [(Wei et al.,2014)](https://www.semanticscholar.org/paper/Sustainable-urban-development%3A-A-review-on-urban-Wei-Huang/21cc7fa87507537893dbceef4cb07a64174ef0d5) |
| Density of drainage pipe in total built space | m2 | [(Wei et al.,2014)](https://www.semanticscholar.org/paper/Sustainable-urban-development%3A-A-review-on-urban-Wei-Huang/21cc7fa87507537893dbceef4cb07a64174ef0d5) |
| Wastewater Treatment Rate | % | [(Dong et al,2022)](https://www.mdpi.com/2071-1050/14/22/15124), [(Schroll et al.,2012)](https://journal-tes.ruc.dk/wp-content/uploads/2021/05/no-5-Henning-Schroll.pdf) |
| Public bathrooms | # | [Jangra and Kaushik (2021)](https://www.researchgate.net/publication/345320353_Estimating_Carrying_Capacity_in_a_High_Mountainous_Tourist_Area_A_Destination_Conservation_Strategy) |
| Sewage Management | [-] | [(Bhagwat, 2021)](https://doi.org/10.1007/978-3-030-61891-9_6) |
| Wastewater Treatment Plants | # | [(Schroll et al.,2012)](https://journal-tes.ruc.dk/wp-content/uploads/2021/05/no-5-Henning-Schroll.pdf) |
| **3.** | **Solid Waste** | Waste treatment – composting , recycling | % | [(Oh et al.,2005)](https://www.scribd.com/document/788762426/Determining-Development-Density-Using-the-Urban-Carrying-Capacity-Assessment-System), [(Schroll et al.,2012)](https://journal-tes.ruc.dk/wp-content/uploads/2021/05/no-5-Henning-Schroll.pdf) |
| Rate of harmless disposal of domestic garbage | % | [(Wei et al.,2014)](https://www.semanticscholar.org/paper/Sustainable-urban-development%3A-A-review-on-urban-Wei-Huang/21cc7fa87507537893dbceef4cb07a64174ef0d5) |
| Volume of garbage disposal | tons | [(Dong et al,2022)](https://www.mdpi.com/2071-1050/14/22/15124) |
| Waste bins | # | [Jangra and Kaushik (2021)](https://www.researchgate.net/publication/345320353_Estimating_Carrying_Capacity_in_a_High_Mountainous_Tourist_Area_A_Destination_Conservation_Strategy) |
| Solid waste management | %/kg | [(Bhagwat, 2021)](https://doi.org/10.1007/978-3-030-61891-9_6) |
| Waste collection | %/kg | [(Schroll et al.,2012)](https://journal-tes.ruc.dk/wp-content/uploads/2021/05/no-5-Henning-Schroll.pdf) |
| Waste Segregation | %/kg | [(Schroll et al.,2012)](https://journal-tes.ruc.dk/wp-content/uploads/2021/05/no-5-Henning-Schroll.pdf) |
| Waste collection points, landfills | # |  |
| **4.** | **Environment and Ecology** | **Topography** | | |
| Elevation | m | [(Kourandeh et al.,2013)](https://bepls.com/nov_2013/10.pdf) [(Salemi et al., 2019)](https://doi.org/10.1080/13504509.2019.1570379) |
| Slope | Degrees (°) | [(](https://bepls.com/nov_2013/10.pdf)[Joseph et al., 2024)](https://journals.christuniversity.in/index.php/atna/article/view/4804), [(Kourandeh et al.,2013)](https://bepls.com/nov_2013/10.pdf), [(Salemi et al., 2019)](https://doi.org/10.1080/13504509.2019.1570379) ,  [(Siahaan et al.,2023)](https://www.cabidigitallibrary.org/doi/pdf/10.5555/20230433522) |
| Soil Texture |  | [(Salemi et al., 2019)](https://doi.org/10.1080/13504509.2019.1570379) |
| Soil Depth | m | [(Salemi et al., 2019)](https://doi.org/10.1080/13504509.2019.1570379) |
| Soil Erosion | m2 | [(Kourandeh et al.,2013)](https://bepls.com/nov_2013/10.pdf) [(](https://bepls.com/nov_2013/10.pdf)[Joseph et al., 2024)](https://journals.christuniversity.in/index.php/atna/article/view/4804), [(Salemi et al., 2019](https://doi.org/10.1080/13504509.2019.1570379) [(Siahaan et al.,2023)](https://www.cabidigitallibrary.org/doi/pdf/10.5555/20230433522) |
| Aspect | m | [(Salemi et al., 2019)](https://doi.org/10.1080/13504509.2019.1570379) |
| **Climate** | | |
| Temperature | °c | [Jangra and Kaushik (2021)](https://www.researchgate.net/publication/345320353_Estimating_Carrying_Capacity_in_a_High_Mountainous_Tourist_Area_A_Destination_Conservation_Strategy) |
| Rainfall | Days | [(Kourandeh et al.,2013)](https://bepls.com/nov_2013/10.pdf), [(Salemi et al., 2019)](https://doi.org/10.1080/13504509.2019.1570379), [(Siahaan et al.,2023)](https://www.cabidigitallibrary.org/doi/pdf/10.5555/20230433522), [(Bardhan and Sarkar,2024)](https://aber.apacsci.com/index.php/SSD/article/view/2550) |
| Snowfall | Days | [(](https://bepls.com/nov_2013/10.pdf)[Joseph et al., 2024)](https://journals.christuniversity.in/index.php/atna/article/view/4804), [(Kourandeh et al.,2013)](https://bepls.com/nov_2013/10.pdf) |
| Extreme Sunshine | Days | [(Kourandeh et al.,2013)](https://bepls.com/nov_2013/10.pdf)  [(Bardhan and Sarkar,2024)](https://aber.apacsci.com/index.php/SSD/article/view/2550),[(](https://bepls.com/nov_2013/10.pdf)[Joseph et al., 2024)](https://journals.christuniversity.in/index.php/atna/article/view/4804), [(Salemi et al., 2019)](https://doi.org/10.1080/13504509.2019.1570379) |
| **Green Cover** | | |
| Green Coverage Area / Vegetation | % | [(Yang et al.,2010)](https://sci-hub.se/https:/doi.org/10.1016/j.cnsns.2009.09.027), [(Oh et al.,2005)](https://www.scribd.com/document/788762426/Determining-Development-Density-Using-the-Urban-Carrying-Capacity-Assessment-System), [(Wei et al.,2014)](https://www.semanticscholar.org/paper/Sustainable-urban-development%3A-A-review-on-urban-Wei-Huang/21cc7fa87507537893dbceef4cb07a64174ef0d5),[(Dong et al,2022)](https://www.mdpi.com/2071-1050/14/22/15124),[(Kourandeh et al.,2013)](https://bepls.com/nov_2013/10.pdf), [(Siahaan et al.,2023)](https://www.cabidigitallibrary.org/doi/pdf/10.5555/20230433522) |
| Per capita public green area | m2 | [(Yang et al.,2010)](https://sci-hub.se/https:/doi.org/10.1016/j.cnsns.2009.09.027),  [(Wei et al.,2014)](https://www.semanticscholar.org/paper/Sustainable-urban-development%3A-A-review-on-urban-Wei-Huang/21cc7fa87507537893dbceef4cb07a64174ef0d5) |
| Coverage of City Forest | % | [(Wei et al.,2014)](https://www.semanticscholar.org/paper/Sustainable-urban-development%3A-A-review-on-urban-Wei-Huang/21cc7fa87507537893dbceef4cb07a64174ef0d5) |
| Area of Parks and Green land | Hectare | [(Dong et al,2022)](https://www.mdpi.com/2071-1050/14/22/15124) |
| **Air** | | |
| Energy | ppm/year | [(Oh et al.,2005)](https://www.scribd.com/document/788762426/Determining-Development-Density-Using-the-Urban-Carrying-Capacity-Assessment-System) |
| Air Quality | % | [(Yang et al.,2010)](https://sci-hub.se/https:/doi.org/10.1016/j.cnsns.2009.09.027) |
| Discharge intensity of SO2/GDP | Kg/1000 yuan | [(Yang et al.,2010)](https://sci-hub.se/https:/doi.org/10.1016/j.cnsns.2009.09.027) |
| **Disaster** | | |
| Landslide / Distance from Fault | m2 | [(](https://bepls.com/nov_2013/10.pdf)[Joseph et al., 2024)](https://journals.christuniversity.in/index.php/atna/article/view/4804) [(Salemi et al., 2019)](https://doi.org/10.1080/13504509.2019.1570379) |
| Flash Flood | m2 | [(](https://bepls.com/nov_2013/10.pdf)[Joseph et al., 2024)](https://journals.christuniversity.in/index.php/atna/article/view/4804) [(Salemi et al., 2019)](https://doi.org/10.1080/13504509.2019.1570379) |
| Flood / Distance from River | m2 | [(](https://bepls.com/nov_2013/10.pdf)[Joseph et al., 2024)](https://journals.christuniversity.in/index.php/atna/article/view/4804) |
| Cyclone/Typhoon | m2 | [(](https://bepls.com/nov_2013/10.pdf)[Joseph et al., 2024)](https://journals.christuniversity.in/index.php/atna/article/view/4804), [(Eduarte et al.,2021)](https://philjournalsci.dost.gov.ph/images/pdf/pjs_pdf/vol150no3/determination_of_carrying_capacity_estimates_of_ecotourism_attractions_.pdf) |
| Lighting and Thunder | m2 | [(](https://bepls.com/nov_2013/10.pdf)[Joseph et al., 2024)](https://journals.christuniversity.in/index.php/atna/article/view/4804) |
| Forest Fire | m2 | [(Kourandeh et al.,2013)](https://bepls.com/nov_2013/10.pdf) [(](https://bepls.com/nov_2013/10.pdf)[Joseph et al., 2024)](https://journals.christuniversity.in/index.php/atna/article/view/4804) |
| 5. | **Demography** | Population Density | Pop/sq.km | [(Yang et al.,2010)](https://sci-hub.se/https:/doi.org/10.1016/j.cnsns.2009.09.027) |
| Population Life Expectancy | % | [(Wei et al.,2014)](https://www.semanticscholar.org/paper/Sustainable-urban-development%3A-A-review-on-urban-Wei-Huang/21cc7fa87507537893dbceef4cb07a64174ef0d5) |
| Tourist Footfall | # | [(Dong et al,2022)](https://www.mdpi.com/2071-1050/14/22/15124), [Jangra and Kaushik (2021)](https://www.researchgate.net/publication/345320353_Estimating_Carrying_Capacity_in_a_High_Mountainous_Tourist_Area_A_Destination_Conservation_Strategy) |
| Tourism Density | T/ m2 | [Jangra and Kaushik (2021)](https://www.researchgate.net/publication/345320353_Estimating_Carrying_Capacity_in_a_High_Mountainous_Tourist_Area_A_Destination_Conservation_Strategy) |
| Ratio of Tourists to Residents | % | [(Dong et al,2022)](https://www.mdpi.com/2071-1050/14/22/15124),[(](https://bepls.com/nov_2013/10.pdf)[Joseph et al., 2024)](https://journals.christuniversity.in/index.php/atna/article/view/4804) |
| No. of students enrolled in universities |  |  |
| 6. | **Land use** | Plowland areas / Agricultural Land | m2 | [(Wei et al.,2014)](https://www.semanticscholar.org/paper/Sustainable-urban-development%3A-A-review-on-urban-Wei-Huang/21cc7fa87507537893dbceef4cb07a64174ef0d5), [(Salemi et al., 2019)](https://doi.org/10.1080/13504509.2019.1570379), [(Kourandeh et al.,2013)](https://bepls.com/nov_2013/10.pdf) |
| Constructive land per capita | m2 | [(Wei et al.,2014)](https://www.semanticscholar.org/paper/Sustainable-urban-development%3A-A-review-on-urban-Wei-Huang/21cc7fa87507537893dbceef4cb07a64174ef0d5) |
| Per capita urban land | m2 | [(Wei et al.,2014)](https://www.semanticscholar.org/paper/Sustainable-urban-development%3A-A-review-on-urban-Wei-Huang/21cc7fa87507537893dbceef4cb07a64174ef0d5) |
| Per capita floor space of houses in urban areas | m2 | [(Wei et al.,2014)](https://www.semanticscholar.org/paper/Sustainable-urban-development%3A-A-review-on-urban-Wei-Huang/21cc7fa87507537893dbceef4cb07a64174ef0d5) |
| Cultivated Land | Hectare | [(Dong et al,2022)](https://www.mdpi.com/2071-1050/14/22/15124) |
| Land for Construction | Hectare | [(Dong et al,2022)](https://www.mdpi.com/2071-1050/14/22/15124), [(](https://bepls.com/nov_2013/10.pdf)[Joseph et al., 2024)](https://journals.christuniversity.in/index.php/atna/article/view/4804) |
| Area available for Tourism | m2 | [Jangra and Kaushik (2021)](https://www.researchgate.net/publication/345320353_Estimating_Carrying_Capacity_in_a_High_Mountainous_Tourist_Area_A_Destination_Conservation_Strategy) |
| Area of watershed suitable for development | m2 | [(Bhagwat, 2021)](https://doi.org/10.1007/978-3-030-61891-9_6) |
| Area not suitable for development | m2 | [(Bhagwat, 2021)](https://doi.org/10.1007/978-3-030-61891-9_6) |
| Floor area ratio | [-] | [(Bhagwat, 2021)](https://doi.org/10.1007/978-3-030-61891-9_6) |
| Floor area requirement per head | m2 | [(Bhagwat, 2021)](https://doi.org/10.1007/978-3-030-61891-9_6) |
| Recreational Parks | m2 | [(Bhagwat, 2021)](https://doi.org/10.1007/978-3-030-61891-9_6) |
| Playgrounds | m2 | [(Bhagwat, 2021)](https://doi.org/10.1007/978-3-030-61891-9_6) |
| Open spaces | m2 | [(Bhagwat, 2021)](https://doi.org/10.1007/978-3-030-61891-9_6) |
| Rural Areas | m2 | [(Salemi et al., 2019)](https://doi.org/10.1080/13504509.2019.1570379) |
| 7. | **Urban Infrastructure** | Per capita area of paved road | m2 | [(Yang et al.,2010)](https://sci-hub.se/https:/doi.org/10.1016/j.cnsns.2009.09.027), [(Wei et al.,2014)](https://www.semanticscholar.org/paper/Sustainable-urban-development%3A-A-review-on-urban-Wei-Huang/21cc7fa87507537893dbceef4cb07a64174ef0d5) |
| Road / Length of Highways / Transportation/Mobility | Km | [(Dong et al,2022)](https://www.mdpi.com/2071-1050/14/22/15124), [(Wei et al.,2014)](https://www.semanticscholar.org/paper/Sustainable-urban-development%3A-A-review-on-urban-Wei-Huang/21cc7fa87507537893dbceef4cb07a64174ef0d5),[(Bhagwat, 2021)](https://doi.org/10.1007/978-3-030-61891-9_6),[(](https://bepls.com/nov_2013/10.pdf)[Joseph et al., 2024)](https://journals.christuniversity.in/index.php/atna/article/view/4804) |
| Subway System | m2 | [(Oh et al.,2005)](https://www.scribd.com/document/788762426/Determining-Development-Density-Using-the-Urban-Carrying-Capacity-Assessment-System) |
| Number of Hospital beds per thousand persons | # | [(Wei et al.,2014)](https://www.semanticscholar.org/paper/Sustainable-urban-development%3A-A-review-on-urban-Wei-Huang/21cc7fa87507537893dbceef4cb07a64174ef0d5),[(Bhagwat, 2021)](https://doi.org/10.1007/978-3-030-61891-9_6) |
| Total No. of Taxis/Cars | # | [(Dong et al,2022)](https://www.mdpi.com/2071-1050/14/22/15124) |
| Parking | # | [Jangra and Kaushik (2021)](https://www.researchgate.net/publication/345320353_Estimating_Carrying_Capacity_in_a_High_Mountainous_Tourist_Area_A_Destination_Conservation_Strategy) |
| Lighting | # | [Jangra and Kaushik (2021)](https://www.researchgate.net/publication/345320353_Estimating_Carrying_Capacity_in_a_High_Mountainous_Tourist_Area_A_Destination_Conservation_Strategy) |
| Food Joints | # | [Jangra and Kaushik (2021)](https://www.researchgate.net/publication/345320353_Estimating_Carrying_Capacity_in_a_High_Mountainous_Tourist_Area_A_Destination_Conservation_Strategy) |
| Power Supply | Hrs | [(Bhagwat, 2021)](https://doi.org/10.1007/978-3-030-61891-9_6) |
| Educational Institutes | #, Coverage rate | [(Bhagwat, 2021)](https://doi.org/10.1007/978-3-030-61891-9_6) |
| Socio-cultural facilities | #, Coverage rate | [(Bhagwat, 2021)](https://doi.org/10.1007/978-3-030-61891-9_6), [(Dong et al,2022)](https://www.mdpi.com/2071-1050/14/22/15124) |
| Communication post and telecom | Coverage rate | [(Bhagwat, 2021)](https://doi.org/10.1007/978-3-030-61891-9_6), [(Wei et al.,2015)](https://www.researchgate.net/profile/Yigang-Wei/publication/344576281_Using_Urban-Carrying_Capacity_as_a_Benchmark_for_Sustainable_Urban_Development_An_Empirical_Study_of_Beijing/links/5f8112fba6fdccfd7b554cb7/Using-Urban-Carrying-Capacity-as-a-Benchmark-for-Sustainable-Urban-Development-An-Empirical-Study-of-Beijing.pdf?origin=publication_detail&_tp=eyJjb250ZXh0Ijp7ImZpcnN0UGFnZSI6InB1YmxpY2F0aW9uIiwicGFnZSI6InB1YmxpY2F0aW9uRG93bmxvYWQiLCJwcmV2aW91c1BhZ2UiOiJwdWJsaWNhdGlvbiJ9fQ&__cf_chl_tk=ahneUJ.m5oR19ZKHuinsR3VEOLVe.8Cfc7ecoV3XsHE-1739353283-1.0.1.1-4xuD2K.ag9r3OQS3jX1PBJ5GSqhec5vs7OkhRXrpDc8),[(Salemi et al., 2019)](https://doi.org/10.1080/13504509.2019.1570379) |
| No. of public library/museum/park per capita | Coverage rate | [(Wei et al.,2015)](https://www.researchgate.net/profile/Yigang-Wei/publication/344576281_Using_Urban-Carrying_Capacity_as_a_Benchmark_for_Sustainable_Urban_Development_An_Empirical_Study_of_Beijing/links/5f8112fba6fdccfd7b554cb7/Using-Urban-Carrying-Capacity-as-a-Benchmark-for-Sustainable-Urban-Development-An-Empirical-Study-of-Beijing.pdf?origin=publication_detail&_tp=eyJjb250ZXh0Ijp7ImZpcnN0UGFnZSI6InB1YmxpY2F0aW9uIiwicGFnZSI6InB1YmxpY2F0aW9uRG93bmxvYWQiLCJwcmV2aW91c1BhZ2UiOiJwdWJsaWNhdGlvbiJ9fQ&__cf_chl_tk=ahneUJ.m5oR19ZKHuinsR3VEOLVe.8Cfc7ecoV3XsHE-1739353283-1.0.1.1-4xuD2K.ag9r3OQS3jX1PBJ5GSqhec5vs7OkhRXrpDc8) |
| Sports Facilities | Coverage rate | [(Wei et al.,2015)](https://www.researchgate.net/profile/Yigang-Wei/publication/344576281_Using_Urban-Carrying_Capacity_as_a_Benchmark_for_Sustainable_Urban_Development_An_Empirical_Study_of_Beijing/links/5f8112fba6fdccfd7b554cb7/Using-Urban-Carrying-Capacity-as-a-Benchmark-for-Sustainable-Urban-Development-An-Empirical-Study-of-Beijing.pdf?origin=publication_detail&_tp=eyJjb250ZXh0Ijp7ImZpcnN0UGFnZSI6InB1YmxpY2F0aW9uIiwicGFnZSI6InB1YmxpY2F0aW9uRG93bmxvYWQiLCJwcmV2aW91c1BhZ2UiOiJwdWJsaWNhdGlvbiJ9fQ&__cf_chl_tk=ahneUJ.m5oR19ZKHuinsR3VEOLVe.8Cfc7ecoV3XsHE-1739353283-1.0.1.1-4xuD2K.ag9r3OQS3jX1PBJ5GSqhec5vs7OkhRXrpDc8) |
| Hotels/Accommodation | # | [(](https://bepls.com/nov_2013/10.pdf)[Joseph et al., 2024)](https://journals.christuniversity.in/index.php/atna/article/view/4804) |
| Historical, Religious and Ancient Sites | m2 | [(Salemi et al., 2019)](https://doi.org/10.1080/13504509.2019.1570379) |
| 8. | **Social** | Accessibility | [-] | [Jangra and Kaushik (2021)](https://www.researchgate.net/publication/345320353_Estimating_Carrying_Capacity_in_a_High_Mountainous_Tourist_Area_A_Destination_Conservation_Strategy),[(Eduarte et al.,2021)](https://philjournalsci.dost.gov.ph/images/pdf/pjs_pdf/vol150no3/determination_of_carrying_capacity_estimates_of_ecotourism_attractions_.pdf) |
| Safety | [-] | [Jangra and Kaushik (2021)](https://www.researchgate.net/publication/345320353_Estimating_Carrying_Capacity_in_a_High_Mountainous_Tourist_Area_A_Destination_Conservation_Strategy), [(](https://bepls.com/nov_2013/10.pdf)[Joseph et al., 2024)](https://journals.christuniversity.in/index.php/atna/article/view/4804) |
| Animal Menace |  | [Jangra and Kaushik (2021)](https://www.researchgate.net/publication/345320353_Estimating_Carrying_Capacity_in_a_High_Mountainous_Tourist_Area_A_Destination_Conservation_Strategy), [(](https://bepls.com/nov_2013/10.pdf)[Joseph et al., 2024)](https://journals.christuniversity.in/index.php/atna/article/view/4804) |
| Seasonality |  | [(](https://bepls.com/nov_2013/10.pdf)[Joseph et al., 2024)](https://journals.christuniversity.in/index.php/atna/article/view/4804) |
| Strikes and Riots |  | [(Eduarte et al.,2021)](https://philjournalsci.dost.gov.ph/images/pdf/pjs_pdf/vol150no3/determination_of_carrying_capacity_estimates_of_ecotourism_attractions_.pdf) |
| Overcrowding |  | [(Eduarte et al.,2021)](https://philjournalsci.dost.gov.ph/images/pdf/pjs_pdf/vol150no3/determination_of_carrying_capacity_estimates_of_ecotourism_attractions_.pdf), [(](https://bepls.com/nov_2013/10.pdf)[Joseph et al., 2024)](https://journals.christuniversity.in/index.php/atna/article/view/4804) |
| 9. | **Economy** | Unemployment Rate | % | [(Wei et al.,2015)](https://www.researchgate.net/profile/Yigang-Wei/publication/344576281_Using_Urban-Carrying_Capacity_as_a_Benchmark_for_Sustainable_Urban_Development_An_Empirical_Study_of_Beijing/links/5f8112fba6fdccfd7b554cb7/Using-Urban-Carrying-Capacity-as-a-Benchmark-for-Sustainable-Urban-Development-An-Empirical-Study-of-Beijing.pdf?origin=publication_detail&_tp=eyJjb250ZXh0Ijp7ImZpcnN0UGFnZSI6InB1YmxpY2F0aW9uIiwicGFnZSI6InB1YmxpY2F0aW9uRG93bmxvYWQiLCJwcmV2aW91c1BhZ2UiOiJwdWJsaWNhdGlvbiJ9fQ&__cf_chl_tk=ahneUJ.m5oR19ZKHuinsR3VEOLVe.8Cfc7ecoV3XsHE-1739353283-1.0.1.1-4xuD2K.ag9r3OQS3jX1PBJ5GSqhec5vs7OkhRXrpDc8), [(Dong et al,2022)](https://www.mdpi.com/2071-1050/14/22/15124) |
| Per capita disposable income |  | [(Wei et al.,2015)](https://www.researchgate.net/profile/Yigang-Wei/publication/344576281_Using_Urban-Carrying_Capacity_as_a_Benchmark_for_Sustainable_Urban_Development_An_Empirical_Study_of_Beijing/links/5f8112fba6fdccfd7b554cb7/Using-Urban-Carrying-Capacity-as-a-Benchmark-for-Sustainable-Urban-Development-An-Empirical-Study-of-Beijing.pdf?origin=publication_detail&_tp=eyJjb250ZXh0Ijp7ImZpcnN0UGFnZSI6InB1YmxpY2F0aW9uIiwicGFnZSI6InB1YmxpY2F0aW9uRG93bmxvYWQiLCJwcmV2aW91c1BhZ2UiOiJwdWJsaWNhdGlvbiJ9fQ&__cf_chl_tk=ahneUJ.m5oR19ZKHuinsR3VEOLVe.8Cfc7ecoV3XsHE-1739353283-1.0.1.1-4xuD2K.ag9r3OQS3jX1PBJ5GSqhec5vs7OkhRXrpDc8) |
| Per capita GDP |  | [(Wei et al.,2015)](https://www.researchgate.net/profile/Yigang-Wei/publication/344576281_Using_Urban-Carrying_Capacity_as_a_Benchmark_for_Sustainable_Urban_Development_An_Empirical_Study_of_Beijing/links/5f8112fba6fdccfd7b554cb7/Using-Urban-Carrying-Capacity-as-a-Benchmark-for-Sustainable-Urban-Development-An-Empirical-Study-of-Beijing.pdf?origin=publication_detail&_tp=eyJjb250ZXh0Ijp7ImZpcnN0UGFnZSI6InB1YmxpY2F0aW9uIiwicGFnZSI6InB1YmxpY2F0aW9uRG93bmxvYWQiLCJwcmV2aW91c1BhZ2UiOiJwdWJsaWNhdGlvbiJ9fQ&__cf_chl_tk=ahneUJ.m5oR19ZKHuinsR3VEOLVe.8Cfc7ecoV3XsHE-1739353283-1.0.1.1-4xuD2K.ag9r3OQS3jX1PBJ5GSqhec5vs7OkhRXrpDc8) |
| Water consumption per unit GDP | Cu.m/unit GDP | [(Yang et al.,2010)](https://sci-hub.se/https:/doi.org/10.1016/j.cnsns.2009.09.027), [(Dong et al,2022)](https://www.mdpi.com/2071-1050/14/22/15124) |
| Energy consumption per 10,000 yuan of GDP | Tons of SCE | [(Dong et al,2022)](https://www.mdpi.com/2071-1050/14/22/15124) |
| Tourism revenue as a percentage of local GDP | % | [(Dong et al,2022)](https://www.mdpi.com/2071-1050/14/22/15124) |
| Foreign Exchange earnings from Tourism |  | [(Dong et al,2022)](https://www.mdpi.com/2071-1050/14/22/15124) |
| 10. | **Food Security** | Calorie Intake | Per capita/day | [(Schroll et al.,2012)](https://journal-tes.ruc.dk/wp-content/uploads/2021/05/no-5-Henning-Schroll.pdf) |
| Rice Yield | yield/hectare |
| On pesticides | Area |
| On nutrient levels and balance | Nitrogen ratio |

1. **Pearson’s coefficient of correlation:**


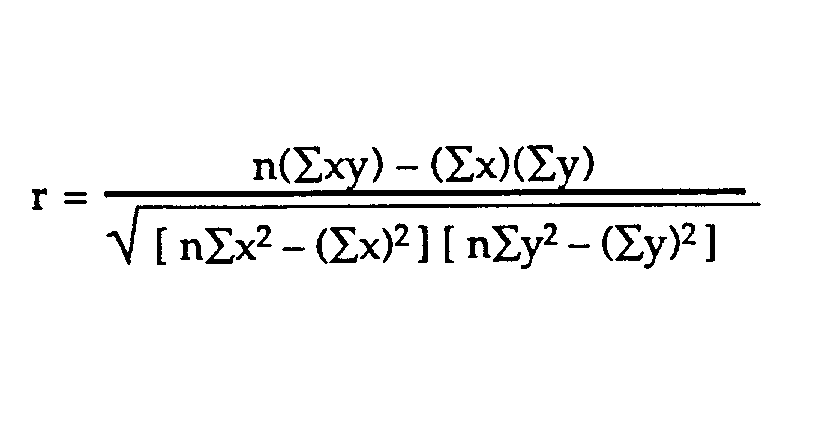


1. **List of Assumptions**

- It is assumed that Non-Revenue Water (NRW) constitutes 15 percent of the total municipal water supply, accounting for standardized inefficiencies in the system.
- Based on Key Informant Interviews (KIIs), 95 percent of wastewater connections were identified; however, for analytical consistency, it is assumed that 100 percent of properties (including residential, commercial, and institutional establishments) are connected to the sewer network, due to the lack of disaggregated data for the remaining 5 percent.
- In accordance with the Central Public Health and Environmental Engineering Organization (CPHEEO) manual, it is assumed that 80 percent of the water supplied is converted into wastewater.
- The total capacity of operational Sewage Treatment Plants (STPs) in Nainital was obtained from the Central Pollution Control Board’s (CPCB) latest inventory on STP status.
- A safety margin of 15 percent is assumed for STP operations, implying that only 85 percent of the total installed treatment capacity is considered usable to account for routine maintenance and operational inefficiencies.
- Water demand for commercial and institutional establishments was calculated based on the Indian Standard IS 1172:1993 guidelines on water requirements for buildings.
- Residential water supply figures were determined through KIIs with municipal officials and other relevant stakeholders.
- It is assumed that wastewater generated from residential households is prioritized for treatment, as it constitutes a statutory obligation of the Urban Local Body (ULB). Only the residual treatment capacity is allocated for commercial and institutional wastewater.
- Daily water abstraction volumes were identified through KIIs conducted with relevant authorities.
- The distribution of supplied water is assumed to follow an 89 percent to 11 percent split between residential and commercial/institutional users, respectively.
- Population projections for the year 2025 were calculated using an arithmetic mean method, based on historical Census data.
- It is assumed that there are no secondary sources of water within the city limits, and that all water is sourced exclusively from municipal infrastructure.
- As per statutory service delivery norms, it is assumed that water supply to residential households is prioritized. Commercial and institutional supply is met only after fulfilling residential requirements.
- For tourism-related traffic estimations, it is assumed that each taxi carries an average of four passengers, based on common vehicle types (typically 5–7 seaters) operating in the region.
- It is assumed that hotel accommodation operates on a basis of double occupancy per room, with the provision of one additional bed per room.
- For sanitation infrastructure calculations, it is assumed that there is an equal distribution of male and female toilet facilities within each public toilet block.
